# Supplementary material
Source: PubMed Central journal article supplement (PMC4626890)
Supplement: JB.00758-15_zjb999093828so1.pdf [file JB.00758-15_zjb999093828so1.pdf]

1 **Supporting Information Legend**

2

3 **Supplemental Table 1.** Minimum Inhibitory Concentrations (MIC<sub>90</sub>) for the antibiotics and iron  
4 chelators used in this study. The concentrations reported were the concentrations used in the  
5 assays of this report. All concentrations are in µg/ml except DIP that is in µM. Antibiotics used:  
6 ampicillin (AMP), cefotaxime (CTX), chloramphenicol (CHL), ciprofloxacin (CIP), daptomycin  
7 (DAP), gentamicin (GEN), levofloxacin (LVX), meropenem (MEM) methicillin (MET),  
8 spectinomycin (SPT), trimethoprim (TMP), vancomycin (VAN), deferiprone (DFP),  
9 deferoxamine (DFX), and 2,2'-dipyridyl (DIP). Data represent mean and standard deviation of at  
10 least six independent replicates.

11

12

13

14

15

16

17

18

19

20

21

22

23

|     | <i>E. coli</i> ExPEC CP9 | <i>S. aureus</i> TCH1516 |
|-----|--------------------------|--------------------------|
| AMP | 5                        | 2000                     |
| CTX | 0.125                    | N/A                      |
| CHL | 1000                     | 10                       |
| CIP | 0.0625                   | N/A                      |
| DAP | N/A                      | 50                       |
| GEN | 12.5                     | N/A                      |
| LVX | 0.1                      | 0.5                      |
| MET | 2500                     | 40                       |
| MEM | 0.04                     | N/A                      |
| SPT | 50                       | 250                      |
| TMP | 1                        | N/A                      |
| VAN | 1000                     | 10                       |
| DFP | 300                      | >1200                    |
| DFX | >4000                    | >2400                    |
| DIP | 500                      | >2500                    |

24

25

26

27

28 **Supplemental Table 2.** Classification and summary of the ferricidal effect of antibiotics tested  
 29 in the study. “Y”=yes, the terminal OD<sub>600</sub> (OD<sub>600-18h</sub> – OD<sub>600-0h</sub>) for the antibiotic+chelator  
 30 treatment was lower than each compound separated; “N”= no growth; “N/A”= not applicable.

| Name | Class           | Mechanism                          | Growth<br>Inhibition<br>(+DFP)<br><i>E. coli</i> | Growth<br>Inhibition<br>(+DFX)<br><i>E. coli</i> | Growth<br>Inhibition<br>(+DIP)<br><i>E. coli</i> | Growth<br>Inhibition<br>(+DFP)<br><i>S. aureus</i> |
|------|-----------------|------------------------------------|--------------------------------------------------|--------------------------------------------------|--------------------------------------------------|----------------------------------------------------|
| AMP  | β-lactam        | inhibits cell wall<br>synthesis    | Y                                                | N                                                | Y                                                | Y                                                  |
| CTX  | β-lactam        | inhibits cell wall<br>synthesis    | Y                                                | N                                                | Y                                                | N/A                                                |
| CHL  | chloramphenicol | inhibits 50S<br>ribosomal subunit  | Y                                                | Y                                                | Y                                                | N                                                  |
| CIP  | fluoroquinolone | inhibits DNA gyrase                | N                                                | N                                                | N                                                | N/A                                                |
| DAP  | lipopeptide     | disrupts membrane<br>integrity     | N/A                                              | N/A                                              | N/A                                              | N                                                  |
| GEN  | aminoglycoside  | inhibits 30S<br>ribosomal subunit  | N                                                | N                                                | N                                                | N/A                                                |
| LVX  | fluoroquinolone | inhibits type II<br>topoisomerases | N                                                | N                                                | N                                                | Y                                                  |
| MET  | β-lactam        | inhibits cell wall<br>synthesis    | Y                                                | N                                                | N                                                | N/A                                                |
| MEM  | β-lactam        | inhibits cell wall<br>synthesis    | N                                                | N                                                | N                                                | N                                                  |

|     |                                         |                                        |   |   |   |     |
|-----|-----------------------------------------|----------------------------------------|---|---|---|-----|
| SPT | aminocyclitol                           | inhibits 30S<br>ribosomal subunit      | N | N | N | N   |
| TMP | dihydrofolate<br>reductase<br>inhibitor | inhibits DNA<br>synthesis              | N | N | N | N/A |
| VAN | glycopeptide                            | inhibits<br>peptidoglycan<br>synthesis | Y | N | Y | N   |

31

32

33

34

35

36

37

38

39

40

41

42

43

44 **Supplementary Table 3.** The known or published properties of three iron chelators (deferiprone,  
 45 2,2'-dipyridyl, and deferoxamine). Listed are the antibiotics that demonstrate enhanced  
 46 antibacterial activity when combined with the chelator, their ability to cross a membrane bilayer,  
 47 molecular weight, and published affinity for iron.

48

| Name           | Abbreviation | Antibacterial activity with:    | Ability to enter cells | Size (g/mol) | Affinity for iron                                                                                                    | Reference |
|----------------|--------------|---------------------------------|------------------------|--------------|----------------------------------------------------------------------------------------------------------------------|-----------|
| Deferiprone    | DFP          | AMP<br>CHL<br>CTX<br>MET<br>VAN | high                   | 139.15       | $1 \times 10^{19} \text{ M}^{-1}$<br>(Fe <sup>3+</sup> )                                                             | (1, 2)    |
| 2,2'-Dipyridyl | DIP          | AMP<br>CHL<br>CTX<br>VAN        | high                   | 156.18       | $1 \times 10^{16} \text{ M}^{-1}$<br>(Fe <sup>3+</sup> )<br>$1 \times 10^{17} \text{ M}^{-1}$<br>(Fe <sup>2+</sup> ) | (3, 4)    |
| Deferoxamine   | DFX          | CHL                             | low                    | 560.68       | $1 \times 10^{30} \text{ M}^{-1}$<br>(Fe <sup>3+</sup> )                                                             | (1, 5)    |

49

50

51

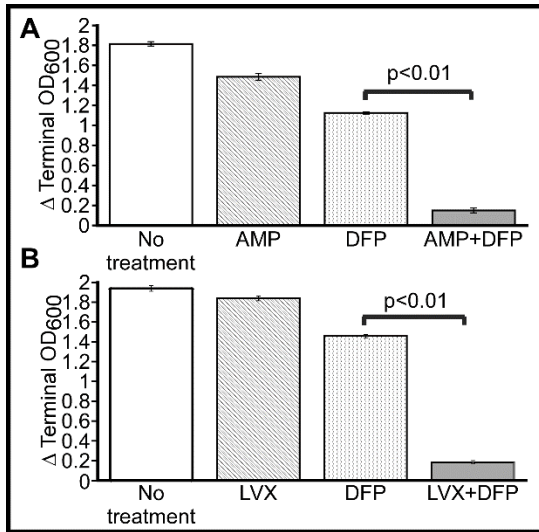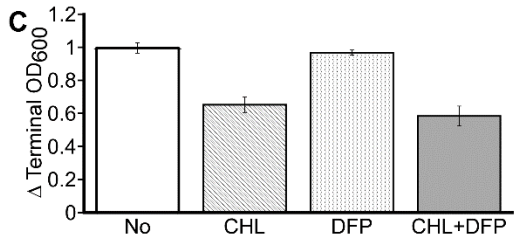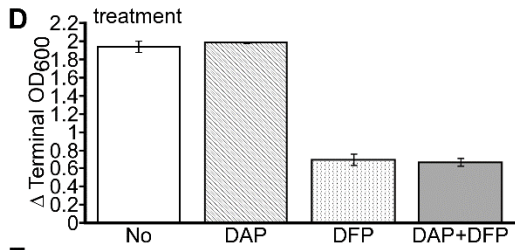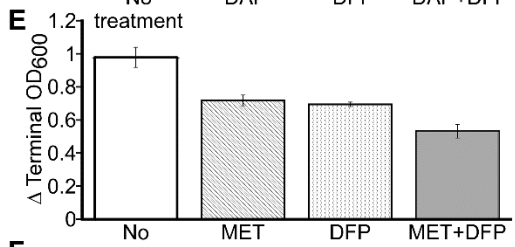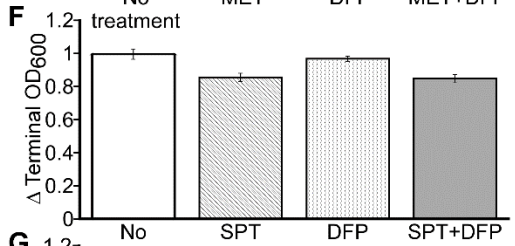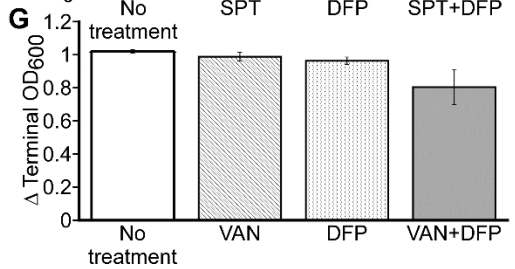

53 **Supplemental Figure 1.** Iron chelators and antibiotics restrict the growth of *S. aureus*. *S. aureus*  
54 TCH1516 was cultured in BHI in the presence or absence of antibiotic, DFP (900 µg/ml), or both  
55 for 18 hrs. and the terminal OD<sub>600</sub> (OD<sub>600-18h</sub> – OD<sub>600-0h</sub>) was measured as described in the  
56 Experimental Procedures. (A) AMP (500 µg/ml), (B) LVX (0.1 µg/ml), (C) CHL (2.5 µg/ml), (D)  
57 DAP (10 µg/ml), (E) MET (10 µg/ml), (F) SPT (50 µg/ml), (G) VAN (1 µg/ml). Data represent  
58 the mean and standard deviation of at least six separate replicates. The *p* value was determined  
59 by a Student's t-test. The black box indicates the antibiotics that showed enhanced bacterial  
60 growth inhibition when combined with DFP.

61

62

63

64

65

66

67

68

69

70

71

72

73

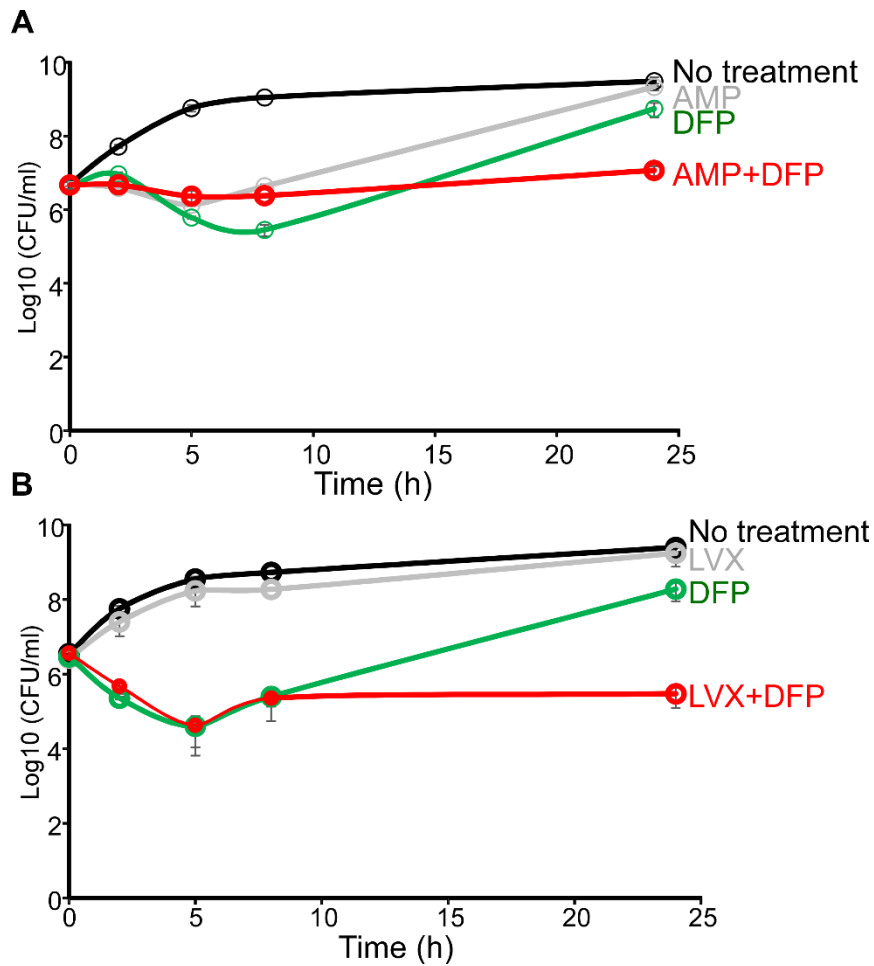

74

75 **Supplemental Figure 2.** Time-kill assays for the antibiotics and DFP that demonstrate an  
 76 enhanced efficacy towards *S. aureus*. Bacteria were cultured in 5 mL BHI overnight at 37 °C with  
 77 vigorous shaking and then subcultured into 5 mL of Cation-Adjusted Mueller-Hinton Broth  
 78 (CAMHB) at a starting OD600 = 0.01, supplemented with antibiotics: (A) AMP (500 µg/ml), (B)  
 79 LVX (0.1 µg/ml), DFP (900 µg/ml), antibiotic with DFP, or not supplemented at all. CFUs of  
 80 each culture were determined by 10 fold serial dilutions and drip-plating of 20 µL of each diluent  
 81 at the times indicated. Data represent the mean and standard deviation of three independent  
 82 experiments.

83



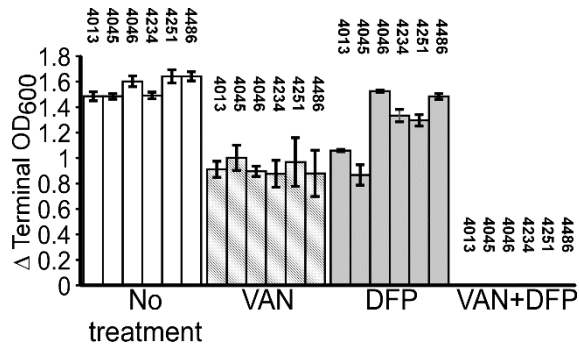

84

85 **Supplemental Figure 3.** The effect of vancomycin and DFP on the growth of clinical *E. coli*

86 isolates. All growth assays were performed in 96 well plates in 200 μl of BHI at a starting

87 OD<sub>600</sub>=0.01. Antibiotics and chelators were added to the well when appropriate at the following

88 concentrations: ELZ4013: 100 μg/ml VAN, 125 μg/ml DFP; ELZ4045: 250 μg/ml VAN, 300

89 μg/ml DFP; ELZ4046: 500 μg/ml VAN, 300 μg/ml DFP; ELZ4234: 400 μg/ml VAN, 300 μg/ml

90 DFP; ELZ4251: 2 mg/ml VAN, 125 μg/ml DFP; and ELZ4486: 500 μg/ml VAN, 300 μg/ml

91 DFP. Bacterial growth was quantified by determining the difference in the optical density

92 between the start and end of the experiment, represented as OD<sub>600-18h</sub> – OD<sub>600-0h</sub>. Data represent

93 the mean and standard deviation of three independent experiments.

94

95

96

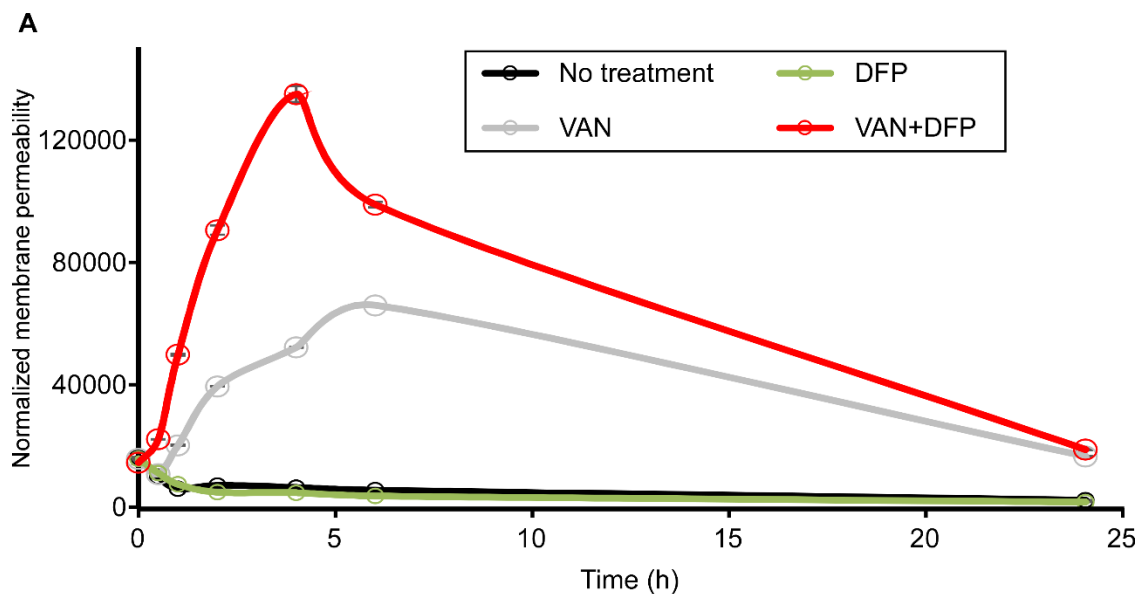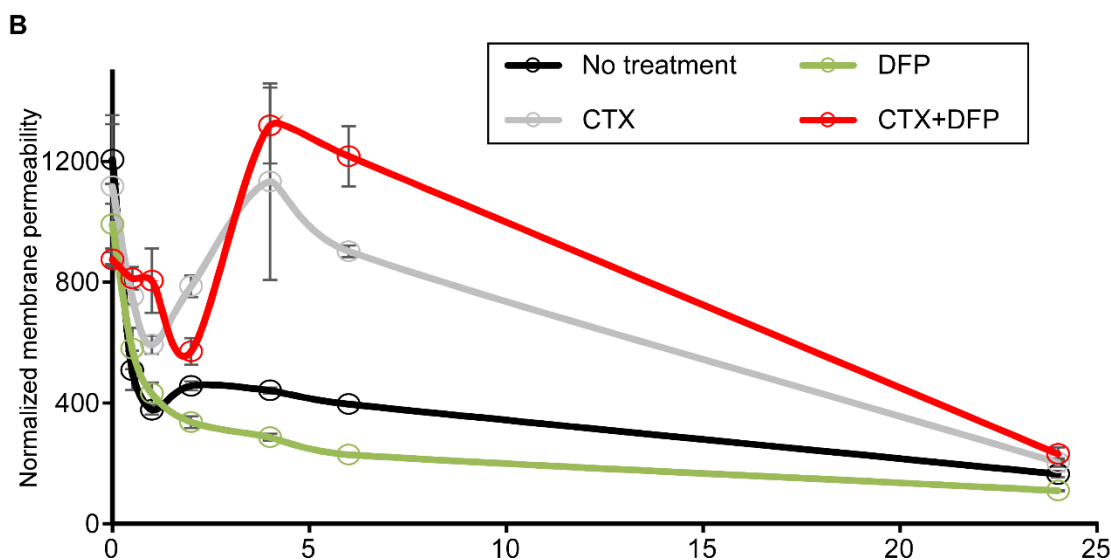

97  
98  
99  
100  
101  
102  
103  
104

**Supplemental Figure 4.** The effect of antibiotic and DFP on membrane permeability. *E. coli* CP9 was cultured in the presence and absence of antibiotics (VAN-250  $\mu\text{g/ml}$ , CTX-62.5 ng/ml), 150  $\mu\text{g/ml}$  DFP, or both. Fluorescence, which positively correlated with membrane permeability, were measured at the indicated times. Data were expressed as fluorescence per cell and represent the mean and standard deviation of three independent experiments.

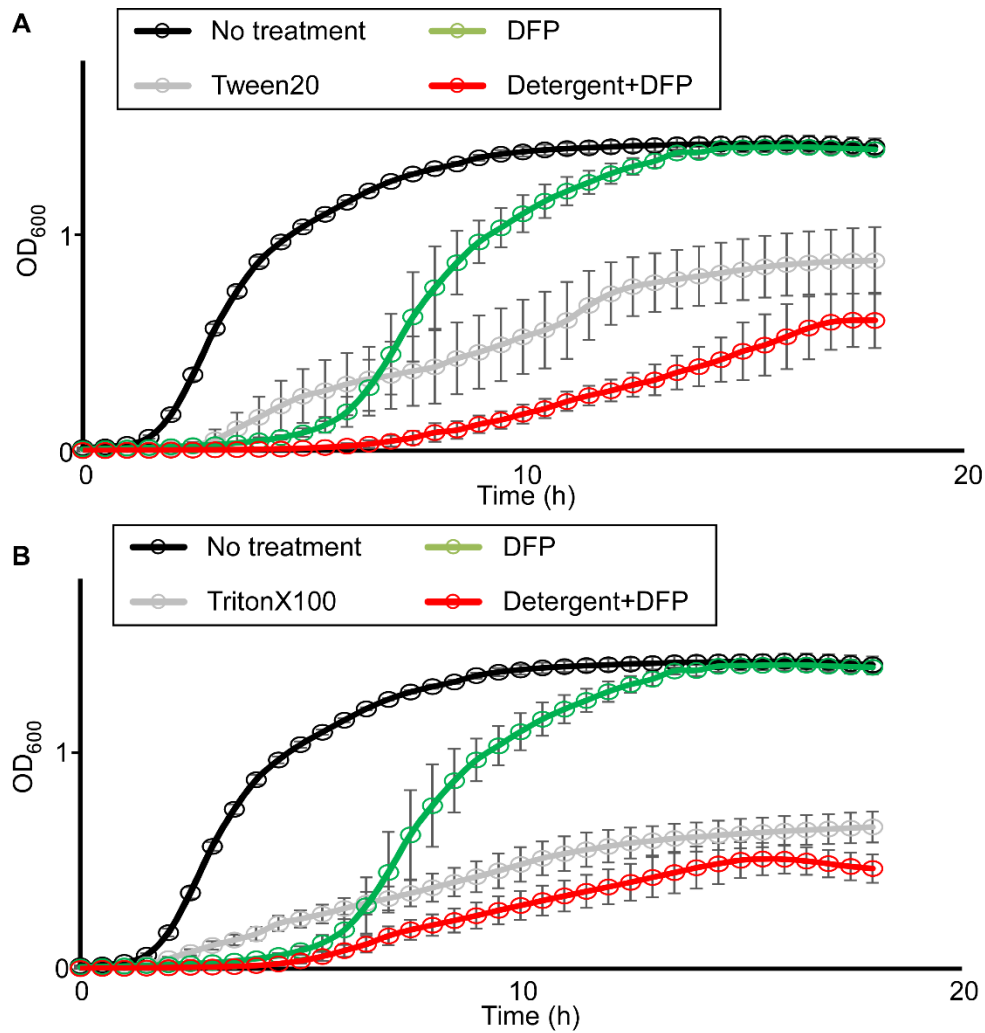

105

106

**Supplemental Figure 5.** The effect of detergents and DFP on the growth of ExPEC. *E. coli*

107

strain CP9 was cultured in the presence and absence of detergents (A - Tween20 and B - Triton-

108

100, both at 20%), DFP (150 µg/ml), or both detergent and DFP and growth (OD<sub>600</sub>) were

109

measured for 18 hrs. The data represent the mean and standard deviation of three independent

110

experiments.

111

112

113

114 **References:**

- 115 1. **De Domenico I, Ward DM, Kaplan J.** 2009. Specific iron chelators determine the  
116 route of ferritin degradation. *Blood* **114**:4546–4551.
- 117 2. **Paauw A, Leverstein-van Hall MA, van Kessel KPM, Verhoef J, Fluit AC.** 2009.  
118 Yersiniabactin reduces the respiratory oxidative stress response of innate immune  
119 cells. *PLoS One* **4**. doi: 10.1371/journal.pone.0008240.
- 120 3. **Petrat F, de Groot H, Rauen U.** 2000. Determination of the chelatable iron pool  
121 of single intact cells by laser scanning microscopy. *Arch. Biochem. Biophys.*  
122 **376**:74–81.
- 123 4. **Schatten H.** 2007. Cation transport, p. 296–297. *In* Schatten, H, Eisenstark, A  
124 (eds.), *Salmonella: methods and protocols*. Springer Science & Business Media.
- 125 5. **Hallaway PE, Eaton JW, Panter SS, Hedlund BE.** 1989. Modulation of  
126 deferoxamine toxicity and clearance by covalent attachment to biocompatible  
127 polymers. *Proc. Natl. Acad. Sci. U. S. A.* **86**:10108–10112.

128
